# Supplementary material for: Proteogenomics in Aid of Host–Pathogen Interaction Studies: A Bacterial Perspective
Source: PubMed Central journal article supplement (PMC5748561; doi:10.3390/proteomes5040026), 2017-10-11
Supplement: proteomes-05-00026-s001.pdf [file proteomes-05-00026-s001.pdf]

**Table S1 | Models used for studying host-pathogen interactions.**

| Bacterial Pathogen            | Host Model <sup>(1)</sup> |                     |                                                | Experimental Approach <sup>(2)</sup> | MOI <sup>(3)</sup>             | Infection Efficiency <sup>(4)</sup>                                   |                                                                     | Reference |
|-------------------------------|---------------------------|---------------------|------------------------------------------------|--------------------------------------|--------------------------------|-----------------------------------------------------------------------|---------------------------------------------------------------------|-----------|
|                               | Cells                     | Type of Cell        | Starting Amount (cells/well)                   |                                      |                                | Infected Cells                                                        | Intracellular Bacteria (*)                                          |           |
| <i>Salmonella Typhimurium</i> | BMDC                      | Primary             | ND                                             | FACS CFU                             | ND                             | 40 %, 2 hpi                                                           | ~10 <sup>4</sup> CFU, 1 hpi                                         | [1]       |
|                               | RAW264.7                  | Macrophage-like     |                                                |                                      |                                | ND                                                                    | ND                                                                  |           |
|                               | HeLa                      | Epithelial          | ND                                             | IF                                   | 50                             | ND                                                                    | 5±4 /cell(**), 2 hpi                                                | [2]       |
|                               | RAW264.7                  | Macrophage-like     | 5 × 10 <sup>5</sup><br>(24 h before infection) | CFU IF                               | 100                            | ND                                                                    | ~10-fold(**) increase, 8 hpi                                        | [3]       |
|                               | HeLa                      | Epithelial          | 5 × 10 <sup>5</sup><br>(24 h before infection) |                                      |                                | > 90%, 2 h pi                                                         | ~10/cell(**), 8 hpi<br>~10-fold increase(**), 8 hpi                 |           |
|                               | Swiss 3T3                 | Fibroblast          | 5 × 10 <sup>5</sup><br>(24 h before infection) |                                      |                                | ND                                                                    | ~10-fold increase(**), 8 hpi                                        |           |
|                               | HeLa                      | Epithelial          | 8 × 10 <sup>4</sup><br>(24 h before infection) | IF CFU                               | 10                             | 81 ± 5 %, 16 hpi                                                      | ~2 × 10 <sup>5</sup> CFU, 14 h pi                                   | [4]       |
|                               | COS-7                     | Fibroblast          | ND                                             | IF                                   | 50                             | > 80 %, 16 hpi                                                        | ND                                                                  |           |
|                               | HeLa-S3                   | Epithelial          | 2 × 10 <sup>5</sup><br>(48 h before infection) | FACS CFU                             | 5                              | ND                                                                    | ~10/cell, 4 h pi<br>~75/cell, 24 h pi                               | [5]       |
|                               |                           |                     |                                                |                                      | 10                             | < 25 %, 4 hpi                                                         | ND                                                                  |           |
|                               |                           |                     |                                                |                                      | 100                            | > 75 %, 4 hpi                                                         | ND                                                                  |           |
|                               | HeLa                      | Epithelial          | ND                                             | CFU                                  | 100                            | ND                                                                    | ~3 fold increase 6 h pi                                             | [6]       |
| RAW264.7                      | Macrophage-like           | 10                  |                                                |                                      | ~20 fold increase 21.5 h pi    |                                                                       |                                                                     |           |
| <i>Yersinia spp.</i>          | BMDC                      | Primary             | 3 × 10 <sup>3</sup>                            | FACS CFU                             | 20                             | 65 %, 4 hpi <i>Y. enterocolitica</i>                                  | 550/100 cells, 4 hpi<br>124/100 cells, 1 dpi<br>27/100 cells, 3 dpi | [7]       |
|                               |                           |                     |                                                |                                      | 50                             | > 95 %, 4 hpi <i>Y. enterocolitica</i>                                | ND                                                                  |           |
|                               | BMM and PEM               | Primary             | 3 – 5 × 10 <sup>6</sup>                        | FACS                                 | 20                             | ~40 % <i>Y. pestis</i><br>~70 % <i>Y. pseudotuberculosis</i><br>3 hpi | ND                                                                  | [8]       |
|                               | HeLa                      | Epithelial          | 2 × 10 <sup>4</sup><br>(48 h before infection) | CFU                                  | 10                             | ~40 % <i>Y. pestis</i> , 2 hpi                                        | ND                                                                  | [9]       |
| hMM                           | Primary                   | ND                  | IF                                             | 2                                    | ~50 % <i>Y. pestis</i> , 2 hpi | ~4/cell, 2 hpi                                                        | [10]                                                                |           |
| BMM                           | Primary                   | 1 × 10 <sup>5</sup> | CFU                                            | 50                                   | ND                             | 10 <sup>3</sup> CFU, 1 hpi                                            | [11]                                                                |           |
| J774.1                        | Macrophages               | 2 × 10 <sup>5</sup> | CFU                                            | 50                                   | ND                             | ~10 <sup>10</sup> CFU/mL(***) 24 hpi                                  | [12]                                                                |           |

|                               |         |             |                                 |             |    |                                                                                         |                                                                                     |      |
|-------------------------------|---------|-------------|---------------------------------|-------------|----|-----------------------------------------------------------------------------------------|-------------------------------------------------------------------------------------|------|
|                               | THP-1   | Monocytes   | $2 \times 10^5$                 | CFU         | 50 | ND                                                                                      | ~10 <sup>9</sup> CFU/mL(***) 24 hpi                                                 | [13] |
|                               | J774.1  | Macrophages | $2 \times 10^5$                 |             |    |                                                                                         | ~10 <sup>8</sup> CFU/mL(***) 24 hpi                                                 |      |
|                               | THP-1   | Monocytes   | $2 \times 10^5$                 |             |    |                                                                                         | ~10 <sup>8</sup> CFU/mL(***) 24 hpi                                                 |      |
|                               | BMM     | Primary     | $2 \times 10^5$                 |             |    |                                                                                         | ~10 <sup>8</sup> CFU/mL(***) 24 hpi                                                 |      |
|                               | hMM     | Primary     | ND                              |             |    |                                                                                         | ~10 <sup>9</sup> CFU/mL(***) 24 hpi                                                 |      |
|                               | hNeu    | Primary     | ND                              |             |    |                                                                                         | ~10 <sup>7</sup> CFU/mL(***) 2 hpi                                                  |      |
|                               | BMM     | Primary     | ND                              | IF          | 50 | > 10 %, 4 hpi<br>> 20 %, 24 hpi                                                         | ~1/cell, 24 h pi                                                                    |      |
| hMM                           | Primary | ND          | > 15 %, 4 hpi<br>> 30 %, 24 hpi |             |    | ~2/cell(**), 24 h pi                                                                    |                                                                                     |      |
| <i>Listeria monocytogenes</i> | hNeu    | Primary     | ND                              | IF          | 1  | > 80 %, 0.5 hpi                                                                         | 4.24±0.44/cell(**), 0.5 hpi                                                         | [14] |
|                               |         |             |                                 |             | 10 | > 90 %, 0.5 hpi                                                                         | 5.38 ± 0.77/cell(**), 5 hpi                                                         |      |
|                               | BMM     | Primary     | $2 \times 10^5$                 | CFU         | 20 | ND                                                                                      | 20/cell, 1 hpi                                                                      | [15] |
|                               | Caco-2  | Epithelial  | ND                              | FACS        | 50 | 30 %, 3 hpi                                                                             | ND                                                                                  | [16] |
|                               | hDC     | Primary     | $5 \times 10^5$                 | EM          | 50 | > 80 %, 1.5 hpi                                                                         | 10 – 35/cell, 1.5 hpi                                                               | [17] |
|                               | hGran   | Primary     | ND                              | FACS<br>CFU | 20 | > 20 %, 1 hpi                                                                           | 214±188/100 cells, 1 hpi<br>(female donors)<br>80±51/100 cells, 1 hpi (male donors) | [18] |
| hMono                         | Primary | ND          | > 95 %, 1 hpi                   |             |    | 344±209/100 cells, 1 hpi<br>(female donors)<br>113±42/100 cells, 1 hpi<br>(male donors) |                                                                                     |      |

(\*) Number of bacteria per cell, CFU and/or increase in CFU (post infection) observed

(\*\*) Microscopy based

(\*\*\*) Total volume of the lysate unspecified

(1) **BMDCs**: Bone Marrow derived Dendritic Cells; **BMMs**: Bone Marrow derived Macrophages, **PEMs**: Peritoneal Macrophages; **h**: human; **MM**: Monocyte derived Macrophage; **Neu**: Neutrophils; **Mono**: Monocytes; **Gran**: Granulocytes; **M**: Mouse; **ND**: Not described.

(2) **CFU**: Colony Forming Units; **IF**: Immunofluorescence; **FACS**: Fluorescent Assisted Cell Sorting; **EM**: Electron Microscopy.

(3) **MOI**: Multiplicity Of Infection; **ND**: Not described.

(4) **hpi**: hours post-infection; **dpi**: days post-infection; **ND**: Not described

## References

1. Jantsch, J., et al., *Intracellular activities of Salmonella enterica in murine dendritic cells*. Cell Microbiol, 2003. 5(12): p. 933-45.
2. Malik-Kale, P., S. Winfree, and O. Steele-Mortimer, *The bimodal lifestyle of intracellular Salmonella in epithelial cells: replication in the cytosol obscures defects in vacuolar replication*. PLoS One, 2012. 7(6): p. e38732.

3. Beuzon, C.R., S.P. Salcedo, and D.W. Holden, *Growth and killing of a Salmonella enterica serovar Typhimurium sifA mutant strain in the cytosol of different host cell lines*. Microbiology, 2002. **148**(Pt 9): p. 2705-15.
4. Abrahams, G.L., P. Muller, and M. Hensel, *Functional dissection of SseF, a type III effector protein involved in positioning the salmonella-containing vacuole*. Traffic, 2006. **7**(8): p. 950-65.
5. Westermann, A.J., et al., *Dual RNA-seq unveils noncoding RNA functions in host-pathogen interactions*. Nature, 2016. **529**(7587): p. 496-501.
6. Brumell, J.H., et al., *SifA permits survival and replication of Salmonella typhimurium in murine macrophages*. Cell Microbiol, 2001. **3**(2): p. 75-84.
7. Schoppet, M., A. Bubert, and H.I. Huppertz, *Dendritic cell function is perturbed by Yersinia enterocolitica infection in vitro*. Clin Exp Immunol, 2000. **122**(3): p. 316-23.
8. Bi, Y., et al., *Yersinia pestis versus Yersinia pseudotuberculosis: effects on host macrophages*. Scand J Immunol, 2012. **76**(6): p. 541-51.
9. Cowan, C., et al., *Invasion of Epithelial Cells by Yersinia pestis: Evidence for a Y. pestis-Specific Invasin*. Infection and Immunity, 2000. **68**(8): p. 4523-4530.
10. Ireland, R., et al., *Effective, broad spectrum control of virulent bacterial infections using cationic DNA liposome complexes combined with bacterial antigens*. PLoS Pathog, 2010. **6**(5): p. e1000921.
11. Geier, H. and J. Celli, *Phagocytic Receptors Dictate Phagosomal Escape and Intracellular Proliferation of Francisella tularensis*. Infection and Immunity, 2011. **79**(6): p. 2204-2214.
12. McRae, S., et al., *Inhibition of AcpA phosphatase activity with ascorbate attenuates Francisella tularensis intramacrophage survival*. J Biol Chem, 2010. **285**(8): p. 5171-7.
13. Mohapatra, N.P., et al., *Type A Francisella tularensis acid phosphatases contribute to pathogenesis*. PLoS One, 2013. **8**(2): p. e56834.
14. Arnett, E., et al., *The pore-forming toxin listeriolysin O is degraded by neutrophil metalloproteinase-8 and fails to mediate Listeria monocytogenes intracellular survival in neutrophils*. J Immunol, 2014. **192**(1): p. 234-44.
15. de Chastellier, C. and P. Berche, *Fate of Listeria monocytogenes in murine macrophages: evidence for simultaneous killing and survival of intracellular bacteria*. Infect Immun, 1994. **62**(2): p. 543-53.
16. Balestrino, D., et al., *Single-Cell Techniques Using Chromosomally Tagged Fluorescent Bacteria To Study Listeria monocytogenes Infection Processes*. Applied and Environmental Microbiology, 2010. **76**(11): p. 3625-3636.
17. Kolb-Maurer, A., et al., *Listeria monocytogenes-infected human dendritic cells: uptake and host cell response*. Infect Immun, 2000. **68**(6): p. 3680-8.
18. Raybourne, R.B., et al., *Uptake and killing of Listeria monocytogenes by normal human peripheral blood granulocytes and monocytes as measured by flow cytometry and cell sorting*. FEMS Immunol Med Microbiol, 2001. **31**(3): p. 219-25.
